# Supplementary material for: A map of the extent and year of detection of oil palm plantations in Indonesia, Malaysia and Thailand
Source: Springer Nature journal article supplement (doi:10.1038/s41597-021-00867-1), 2021-03-30
Supplement: MOESM1 [file 41597_2021_867_MOESM1_ESM.docx]

    {
      "access_rights": "info:eu-repo/semantics/openAccess",
      "eprintid": 17144,
      "date": "2021-03-30",
      "documents": [
          {
            "language": "en",
            "placement": 1,
            "eprintid": 17144,
            "files": [
                {
                  "hash_type": "MD5",
                  "mtime": "2021-03-30 09:36:23",
                  "datasetid": "document",
                  "fileid": 272045,
                  "objectid": 93776,
                  "uri": "https://pure.iiasa.ac.at/id/file/272045",
                  "mime_type": "application/pdf",
                  "hash": "2633db6fec8f5103fa437647843f0fa9",
                  "filesize": 5710971,
                  "filename": "s41597-021-00867-1.pdf"
                }
            ],
            "content": "published",
            "license": "cc_by_4",
            "rev_number": 2,
            "uri": "https://pure.iiasa.ac.at/id/document/93776",
            "main": "s41597-021-00867-1.pdf",
            "mime_type": "application/pdf",
            "docid": 93776,
            "format": "text",
            "security": "public",
            "pos": 1
          },
          {
            "language": "en",
            "placement": 2,
            "eprintid": 17144,
            "files": [
                {
                  "hash_type": "MD5",
                  "mtime": "2021-03-30 09:42:58",
                  "datasetid": "document",
                  "fileid": 272052,
                  "objectid": 93777,
                  "uri": "https://pure.iiasa.ac.at/id/file/272052",
                  "mime_type": "application/vnd.openxmlformats-officedocument.wordprocessingml.document",
                  "hash": "084210cf83db9c8df0df0848f92bd12d",
                  "filesize": 1952079,
                  "filename": "41597_2021_867_MOESM1_ESM.docx"
                }
            ],
            "content": "supplemental",
            "license": "cc_by_4",
            "rev_number": 2,
            "uri": "https://pure.iiasa.ac.at/id/document/93777",
            "main": "41597_2021_867_MOESM1_ESM.docx",
            "mime_type": "application/vnd.openxmlformats-officedocument.wordprocessingml.document",
            "docid": 93777,
            "format": "text",
            "security": "public",
            "pos": 2
          }
      ],
      "projects": [
        "RESTORE+",
        "Harnessing the power of crowdsourcing to improve land cover and land-use information (CROWDLAND, FP7 617754)",
        "An Ecosystem of Citizen Observatories for Environmental Monitoring (WeObserve, H2020 776740)"
      ],
      "pagerange": "art. 96",
      "publisher": "NPG",
      "fp7_project_id": "info:eu-repo/grantAgreement/EC/FP7/617754/EU//CROWDLAND; info:eu-repo/grantAgreement/EC/H2020/776740/EU//WeObserve",
      "fp7_project": "yes",
      "datestamp": "2021-03-30 09:43:26",
      "uri": "https://pure.iiasa.ac.at/id/eprint/17144",
      "creators_browse_id": [
        59,
        234,
        276,
        202,
        3185,
        165,
        98
      ],
      "publication": "Scientific Data",
      "type": "article",
      "title": "A map of the extent and year of detection of oil palm plantations in Indonesia, Malaysia and Thailand",
      "abstract": "In recent decades, global oil palm production has shown an abrupt increase, with almost 90% produced in Southeast Asia alone. To understand trends in oil palm plantation expansion and for landscape-level planning, accurate maps are needed. Although different oil palm maps have been produced using remote sensing in the past, here we use Sentinel 1 imagery to generate an oil palm plantation map for Indonesia, Malaysia and Thailand for the year 2017. In addition to location, the age of the oil palm plantation is critical for calculating yields. Here we have used a Landsat time series approach to determine the year in which the oil palm plantations are first detected, at which point they are 2 to 3 years of age. From this, the approximate age of the oil palm plantation in 2017 can be derived.",
      "userid": 2,
      "issn": "2052-4463",
      "rev_number": 19,
      "dir": "disk0/00/01/71/44",
      "creators": [
        {
          "orcid": null,
          "name": {
            "lineage": null,
            "given": "O.",
            "honourific": null,
            "family": "Danylo"
          },
          "id": 8670
        },
        {
          "orcid": null,
          "name": {
            "lineage": null,
            "given": "J.",
            "honourific": null,
            "family": "Pirker"
          },
          "id": 2031
        },
        {
          "orcid": null,
          "name": {
            "lineage": null,
            "given": "G.",
            "honourific": null,
            "family": "Lemoine"
          },
          "id": null
        },
        {
          "orcid": null,
          "name": {
            "lineage": null,
            "given": "G.",
            "honourific": null,
            "family": "Ceccherini"
          },
          "id": null
        },
        {
          "orcid": "0000-0002-2665-7065",
          "name": {
            "lineage": null,
            "given": "L.",
            "honourific": null,
            "family": "See"
          },
          "id": 8571
        },
        {
          "orcid": "0000-0002-5812-9988",
          "name": {
            "lineage": null,
            "given": "I.",
            "honourific": null,
            "family": "McCallum"
          },
          "id": 1731
        },
        {
          "orcid": null,
          "name": {
            "lineage": null,
            "given": null,
            "honourific": null,
            "family": "Hadi"
          },
          "id": 9030
        },
        {
          "orcid": null,
          "name": {
            "lineage": null,
            "given": "F.",
            "honourific": null,
            "family": "Kraxner"
          },
          "id": 7904
        },
        {
          "orcid": null,
          "name": {
            "lineage": null,
            "given": "F.",
            "honourific": null,
            "family": "Achard"
          },
          "id": null
        },
        {
          "orcid": "0000-0003-0420-8549",
          "name": {
            "lineage": null,
            "given": "S.",
            "honourific": null,
            "family": "Fritz"
          },
          "id": 8130
        }
      ],
      "lastmod": "2022-10-19 05:01:17",
      "ispublished": "pub",
      "metadata_visibility": "show",
      "id_number": "10.1038/s41597-021-00867-1",
      "eprint_status": "archive",
      "status_changed": "2021-03-30 09:43:26",
      "volume": 8,
      "coversheets_dirty": "FALSE",
      "full_text_status": "public",
      "related_url": [
        {
          "url": "https://dare.iiasa.ac.at/85/",
          "type": "data"
        },
        {
          "url": "https://github.com/odanylo/oilpalmseasia",
          "type": "author"
        },
        {
          "url": "https://olhadanylo.users.earthengine.app/view/oilpalmseasia",
          "type": "author"
        }
      ],
      "refereed": "TRUE",
      "fp7_type": "info:eu-repo/semantics/article",
      "divisions": [
        "NODES",
        "AFE",
        "SI"
      ]
    }
